# Supplementary material for: Switching to Biosimilar SDZ-ADL in Patients with Moderate-to-Severe Active Rheumatoid Arthritis: 48-Week Efficacy, Safety and Immunogenicity Results From the Phase III, Randomized, Double-Blind ADMYRA Study
Source: PubMed Central journal article supplement — BioDrugs. 2020 Oct 29;34(6):809–23. doi: 10.1007/s40259-020-00447-6 (PMC7669771; doi:10.1007/s40259-020-00447-6), 2020-10-29
Supplement: 40259_2020_447_MOESM1_ESM.pdf [file 40259_2020_447_MOESM1_ESM.pdf]

## Online resource

### **Switching to biosimilar SDZ-ADL in patients with moderate-to-severe active rheumatoid arthritis: 48-week efficacy, safety and immunogenicity results from the Phase III, randomized, double-blind ADMYRA study**

Piotr Wiland<sup>1\*</sup>, Sławomir Jeka<sup>2</sup>, Eva Dokoupilová<sup>3</sup>, Jan Brandt-Jürgens<sup>4</sup>, Juan Manuel Miranda Limón<sup>5</sup>, Miguel Cantalejo Moreira<sup>6</sup>, Raul Veiga Cabello<sup>7</sup>, Julia Jauch-Lembach<sup>8</sup>, Anjali Thakur<sup>8</sup>, Halimuniyazi Haliduola<sup>8</sup>, Ines Brueckmann<sup>9</sup> and Norman B. Gaylis<sup>10</sup>

<sup>1</sup>Department of Rheumatology and Internal Medicine, Medical University, Wrocław, Poland

<sup>2</sup>Department of Rheumatology and Connective Tissue Diseases, University Hospital No. 2, Collegium Medicum UMK, Bydgoszcz, Poland

<sup>3</sup>MEDICAL PLUS s.r.o., Uherske Hradiste; University of Veterinary and Pharmaceutical sciences, Faculty of Pharmacy, Department of Pharmaceutics, Czech Republic

<sup>4</sup>Rheumatology private practice, Berlin, Germany

<sup>5</sup>RM Pharma Specialists, Mexico City, Mexico

<sup>6</sup>Unidad de Reumatología, Hospital Universitario de Fuenlabrada, Fuenlabrada, Madrid, Spain

<sup>7</sup>Hospital Central de la Defensa, Glorieta Ejército, 1, 28047 Madrid, Spain

<sup>8</sup>Global Clinical Development, Biopharmaceuticals, Hexal AG (A Sandoz Company), Holzkirchen, Germany

<sup>9</sup>Global Medical Affairs, Biopharmaceutical, Hexal AG (A Sandoz Company), Holzkirchen, Germany

<sup>10</sup>Arthritis & Rheumatic Disease Specialties, Aventura, FL, USA

## Address for correspondence

Prof. dr hab. Piotr Wiland  
Department of Rheumatology and Internal Medicine,  
Medical University,  
Wrocław, Poland

Telephone: +48 71 734 33 00

Fax: +48 71 734 33 09

Email: [pwiland1@gmail.com](mailto:pwiland1@gmail.com)

**Supplementary Figure S1. Patient disposition**

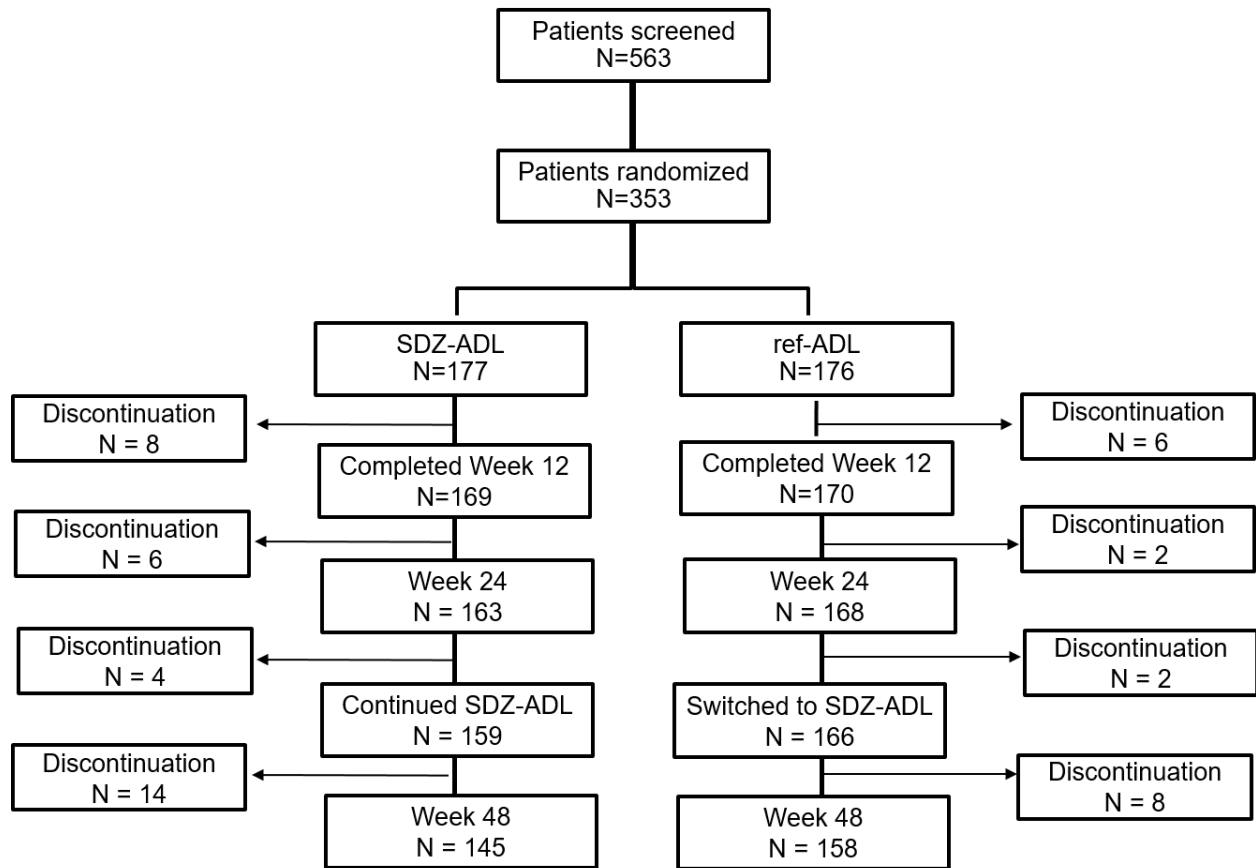

N, total number of patients; ref-ADL- reference adalimumab; SDZ- Sandoz biosimilar  
 Week 12: primary endpoint assessment; Week 24: end of Study Period 1, patients in  
 the ref-ADL group were switched to SDZ-ADL for the second half of the study; Week 48:  
 end of study

## Reasons for Discontinuation in study periods 1 and 2

The proportion of patients who discontinued during Study Period 1 (SP1 FAS) in the SDZ-ADL group and ref-ADL group were 14 (7.9%) and 8 (4.5%), respectively. Main reasons of discontinuation include:

| <b>Reason</b>         | <b>SDZ-ADL<br/>N=177<br/>n (%)</b> | <b>Ref-ADL<br/>N=176<br/>n (%)</b> |
|-----------------------|------------------------------------|------------------------------------|
| Withdrawal by patient | 8 (4.5)                            | 4 (2.3)                            |
| Protocol deviation(s) | 2 (1.1)                            | 1 (0.6)                            |
| Adverse event(s)      | 1 (0.6)                            | 1 (0.6)                            |
| Loss to follow-up     | 1 (0.6)                            | 1 (0.6)                            |
| Lack of efficacy      | 1 (0.6)                            | 0                                  |
| Other                 | 0                                  | 1 (0.6)                            |
| Pregnancy             | 1 (0.6)                            | 0                                  |

The proportion of patients who discontinued during Study Period 2 (SP2 FAS) in the SDZ-ADL group and ref-ADL group were 14 (8.8%) and 8 (4.8%) respectively. Main reasons of discontinuation include:

| <b>Reason</b>         | <b>Continued<br/>SDZ-ADL<br/>N=159</b> | <b>Ref-ADL to<br/>SDZ-ADL<br/>N=166</b> |
|-----------------------|----------------------------------------|-----------------------------------------|
| Adverse event(s)      | 5 (3.1)                                | 0                                       |
| Lack of efficacy      | 3 (1.9)                                | 2 (1.2)                                 |
| Other                 | 3 (1.9)                                | 2 (1.2)                                 |
| Withdrawal by patient | 2 (1.3)                                | 2 (1.2)                                 |
| Loss to follow-up     | 0                                      | 2 (1.2)                                 |
| Protocol deviation(s) | 1 (0.6)                                | 0                                       |

**Supplementary Table S1:** Mean change from baseline in the assessment scores after the switch from ref-ADL to SDZ-ADL (SP1 FAS)

| <b>Time point</b>                                                                                                                                                                           | <b>SDZ-ADL<br/>(N=177)</b> | <b>“ref-ADL/switched SDZ-ADL”<br/>(N=176)</b> |
|---------------------------------------------------------------------------------------------------------------------------------------------------------------------------------------------|----------------------------|-----------------------------------------------|
| <b>Patient’s pain assessment score, mean (SD)</b>                                                                                                                                           |                            |                                               |
| Week 24                                                                                                                                                                                     | -38.5 (25.7)               | -41.4 (24.2)                                  |
| Week 48                                                                                                                                                                                     | -36.0 (27.7)               | -39.2 (26.9)                                  |
| <b>Patient’s global assessment of disease activity, mean (SD)</b>                                                                                                                           |                            |                                               |
| Week 24                                                                                                                                                                                     | -38.2 (24.1)               | -41.5 (23.9)                                  |
| Week 48                                                                                                                                                                                     | -35.1 (25.7)               | -39.4 (25.7)                                  |
| <b>Physician’s global assessment of disease activity, mean (SD)</b>                                                                                                                         |                            |                                               |
| Week 24                                                                                                                                                                                     | -46.3 (22.2)               | -47.3 (20.6)                                  |
| Week 48                                                                                                                                                                                     | -44.6 (23.4)               | -47.2 (22.1)                                  |
| ref-ADL, reference adalimumab; SDZ-ADL, Sandoz adalimumab SD, standard deviation<br>SP1 FAS, study period 1 full analysis set: all randomized patients to whom study drug was administered; |                            |                                               |

**Supplementary Table S2: Change from baseline in DAS28-CRP up to Week 24  
(SP1 FAS)**

| Visit    | SDZ-ADL<br>(N=177)            |                         | ref-ADL<br>(N=176)            |                         |
|----------|-------------------------------|-------------------------|-------------------------------|-------------------------|
|          | At time point<br>n; Mean (SD) | Change from<br>baseline | At time point<br>n; Mean (SD) | Change from<br>baseline |
| Baseline | 174; 5.6 (0.88)               |                         | 175; 5.72 (0.84)              |                         |
| Week 4   | 169; 4.2 (1.23)               | 168; -1.40 (1.06)       | 172; 4.16 (1.12)              | 171; -1.55 (1.05)       |
| Week 12  | 167; 3.5 (1.25)               | 166; -2.12 (1.17)       | 168; 3.5 (1.21)               | 167; -2.24 (1.13)       |
| Week 24  | 160; 2.9 (1.01)               | 158; -2.71(1.19)        | 167; 2.76 (1.0)               | 166; -2.94 (1.08)       |

CRP - C-reactive protein, DAS - disease activity score; n - total number of patients assessed;  
ref-ADL- reference adalimumab; SDZ- Sandoz biosimilar adalimumab

**Supplementary Table S3: Proportion of patients achieving EULAR remission, good response, or moderate response up to Week 24 (SP1 FAS)**

|                         |         | SDZ-ADL<br>(N=177) |           | ref-ADL<br>(N=176) |            |
|-------------------------|---------|--------------------|-----------|--------------------|------------|
| Response                | Visit   | M                  | n (%)     | M                  | n (%)      |
| EULAR remission         | Week 4  | 169                | 19 (11.2) | 172                | 13 (7.6)   |
|                         | Week 12 | 167                | 42 (25.1) | 168                | 43 (25.6)  |
|                         | Week 24 | 160                | 61 (38.1) | 167                | 80 (47.9)  |
| EULAR good response     | Week 4  | 168                | 32 (19.0) | 171                | 34 (19.9)  |
|                         | Week 12 | 166                | 65 (39.2) | 167                | 70 (41.9)  |
|                         | Week 24 | 158                | 94 (59.5) | 166                | 108 (65.1) |
| EULAR moderate response | Week 4  | 168                | 82 (48.8) | 171                | 94 (55.0)  |
|                         | Week 12 | 166                | 79 (47.6) | 167                | 79 (47.3)  |
|                         | Week 24 | 158                | 54 (34.2) | 166                | 55 (33.1)  |

EULAR, European League Against Rheumatism; M - total number of patients with evaluable data in each group at a visit; n - total number of patients achieving response/remission; ref-ADL- reference adalimumab; SDZ- Sandoz biosimilar adalimumab; SP1 FAS – study period 1 full analysis set

**Supplementary Table S4: Proportion of patients achieving remission according to Boolean definition up to Week 24 (SP1 FAS)**

| Visit   | SDZ-ADL<br>(N=177) |           | ref-ADL<br>(N=176) |           |
|---------|--------------------|-----------|--------------------|-----------|
|         | M                  | n (%)     | M                  | n (%)     |
| Week 4  | 169                | 5 (3.0)   | 172                | 1 (0.6)   |
| Week 12 | 167                | 13 (7.8)  | 168                | 12 (7.1)  |
| Week 24 | 160                | 24 (15.0) | 167                | 29 (17.4) |

M - total number of patients with evaluable data in each group at a visit; n - total number of patients achieving response/remission (Remission according to Boolean definition is defined as TJC  $\leq$ 1, SJC $\leq$ 1, CRP $\leq$ 1 mg/dl and patient global assessment (PtGA) $\leq$ 1); ref-ADL- reference adalimumab; SDZ- Sandoz biosimilar adalimumab; SP1 FAS – study period 1 full analysis set

**Supplementary Table S5: Summary of number of patients achieving ACR20/50/70 response up to Week 24 (SP1 FAS)**

|                   |              | <b>SDZ-ADL<br/>(N=177)</b> |              | <b>ref-ADL<br/>(N=176)</b> |              |
|-------------------|--------------|----------------------------|--------------|----------------------------|--------------|
| <b>Response</b>   | <b>Visit</b> | <b>M</b>                   | <b>n (%)</b> | <b>M</b>                   | <b>n (%)</b> |
| ACR20<br>response | Week 4       | 174                        | 85 (48.9)    | 173                        | 91 (52.6)    |
|                   | Week 12      | 169                        | 119 (70.4)   | 170                        | 129 (75.9)   |
|                   | Week 24      | 164                        | 136 (82.9)   | 168                        | 156 (92.9)   |
| ACR50<br>response | Week 4       | 174                        | 29 (16.7)    | 173                        | 32 (18.5)    |
|                   | Week 12      | 169                        | 62 (36.7)    | 170                        | 77 (45.3)    |
|                   | Week 24      | 164                        | 97 (59.1)    | 168                        | 113 (67.3)   |
| ACR70<br>response | Week 4       | 174                        | 8 (4.6)      | 173                        | 10 (5.8)     |
|                   | Week 12      | 169                        | 29 (17.2)    | 170                        | 38 (22.4)    |
|                   | Week 24      | 164                        | 55 (33.5)    | 168                        | 63 (37.5)    |

ACR - American College of Rheumatology; M - total number of patients with evaluable data in each group at a visit; n - total number of patients achieving response; ref-ADL- reference adalimumab; SDZ- Sandoz biosimilar adalimumab; SP1 FAS – study period 1 full analysis set
